# Supplementary material
Source: PubMed Central journal article supplement (PMC3935509)
Supplement: NIHMS382493-supplement-01.pdf [file NIHMS382493-supplement-01.pdf]

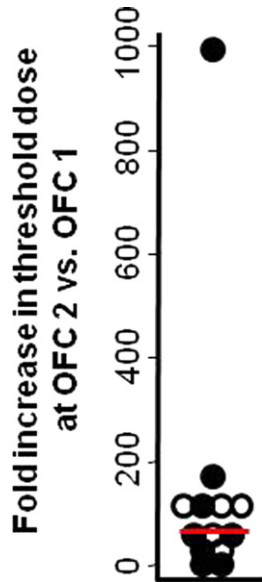

**FIG E1.** Distribution of the fold increase in threshold dose of peanut protein inducing allergic symptoms for OFC2 compared with OFC1 ( $n = 13$ ). *Open circles* indicate group A subjects; *solid circles* indicate group B subjects. The median response is indicated by the *red bar*.

**TABLE E1.** Numbers of patients with evaluable data for each end point

|                | OFC1    |         | OFC2    |         | OFC3    |         |
|----------------|---------|---------|---------|---------|---------|---------|
|                | Group A | Group B | Group A | Group B | Group A | Group B |
| Threshold dose | 5       | 9       | 5       | 8       | 4       | 6       |
| BHR            | 5       | 9       | 5       | 9       | 0       | 7*      |
| SPTT           | 5       | 9       | 5       | 9       | 5       | 7       |

\*BHR at OFC3 was only obtained for group B subjects per the study protocol.
